# Supplementary material for: Influence of sodium intake and change in sodium intake on plasma-renin in man
Source: PubMed Central journal article supplement — eClinicalMedicine. 2021 Feb 4;33:100750. doi: 10.1016/j.eclinm.2021.100750 (PMC8020155; doi:10.1016/j.eclinm.2021.100750), 2021-02-04
Supplement: mmc1.pdf [file mmc1.pdf]

## **Appendix: Influence of sodium intake and change in sodium intake on plasma-renin in man.**

Niels Graudal, Thorbjørn Hubeck-Graudal, Gesche Jürgens

### **Methods**

#### Search string for identification of studies

- 1 sodium chloride, dietary/
- 2 sodium, dietary/
- 3 sodium/
- 4 (sodium or salt?).tw,kf.
- 5 or/1-4
- 6 diet, sodium-restricted/
- 7 ((salt? or sodium) adj5 (chang\$ or curb\$ or diet\$ or free or intake or limit\$ or load\$ or low\$ or minimi\$ or reduc\$ or restrict\$ or supplement\$)).tw,kf.
- 8 dash diet?.tw,kf.
- 9 or/6-8
- 10 hypertension/
- 11 essential hypertension/
- 12 (antihypertens\$ or hypertens\$ or normotens\$ or prehypertens\$).tw,kf.
- 13 exp blood pressure/
- 14 (blood pressure or bloodpressure or bp or dbp or hbp or mbp or sbp).tw,kf.
- 15 or/10-14
- 16 renin/
- 17 renin.tw,kf.
- 18 aldosterone/

- 19 aldosterone.tw,kf.
- 20 exp catecholamines/
- 21 (catecholamine\$ or sympathin\$ or dopamine\$ or hydroxytyramine\$ or dihydroxyphenethylamine or intropin or epinephrine or adrenaline or epitrate or vaponefrin or medihaler-epi or micronefrin or micronephrine or racepinephrine or epifrin or lyophrin or norepinephrin\$ or noradrenaline or levarterenol or levonorepinephrine or levophed or arterenol or levonor or orciprenaline or metaproterenol or alupent or metaprel or alotec or astmopent).tw,kf.
- 22 exp cholesterol/
- 23 (cholesterol\$ or epicholesterol\$ or azacosterol\$ or diazacholesterol\$ or hydroxycholesterol\$ or 19-iodocholesterol\$ or iodocholesterol\$ or ketocholesterol\$ or oxocholesterol\$ or lipid\$ or glyceride\$ or triglyceride\$ or glycolipid\$ or lipoprotein\$ or ldl or hdl).tw,kf.
- 24 or/16-23
- 25 randomized controlled trial.pt.
- 26 controlled clinical trial.pt.
- 27 randomized.ab.
- 28 placebo.ab.
- 29 clinical trials as topic/
- 30 randomly.ab.
- 31 trial.ti.
- 32 or/25-31
- 33 animals/ not (humans/ and animals/)
- 34 32 not 33
- 35 5 and 9 and (15 or 24) and 34

## Results

*Study selection:* The primary search was performed March 10, 2016. This search revealed 6831 articles and after de-duplication 3269 remained. After a screening based on reading of abstracts 2983 were eliminated. Thus 291 full-text articles were reviewed and of these 204 were included and 87 excluded. In addition, we included 3 studies from our 1998 version<sup>1</sup>, one from our 2011 version<sup>2</sup>, and one from another meta-analysis<sup>3</sup>. Thus, a total of 209 references were included based on the March 2016 search. The secondary search was performed April 11, 2018. This search revealed 8335 articles and after de-duplication 4014 remained. Of these, 877 were new compared with the primary search. After a primary screening 561 were eliminated. Based on a screening of abstracts 277 of the remaining 316 articles were excluded. Thus 39 full-text articles were reviewed and of these 10 were included. Thus, by April 11 2018, 219 articles were included. The last search was performed on March 18, 2020. This search covered the period from March 2016 to March 18 2020 and revealed 2222 references and after de-duplication 1448 remained. Compared with the April 11, 2018 search 843 were new. After a primary screening 271 were eliminated. Based on a screening of abstracts, 537 of the remaining 572 articles were excluded. Thus 35 full-text articles were reviewed and of these 12 fulfilled criteria for inclusion. Thus, by March 18 2020, 231 articles were included. From this pool we selected 105 studies, which measured renin as outcome.

*Reasons for exclusion of studies:* Four studies<sup>4-7</sup> were excluded due to use of anti-hypertensive medications. Four parallel trials were excluded<sup>8-11</sup>. As the large majority of cross-over studies reported separate data for each intervention period instead of overall estimates of effect, the continuous data type was used in the separate analyses of the cross-over studies. We transformed the outcomes of 14 studies which reported renin as concentrations (mU/L) to renin as activities (ng/ml/h) by division with 8.2, which is the

regression coefficient assessed from the regression line associating renin concentration (mU/L) with renin activity (ng/ml/h) in figure 2 in the study by De Bruin et al.<sup>12</sup>. Three studies with no information to decide the unit of the outcome<sup>13-15</sup> were excluded from the statistical analysis. One outlier study did not reduce sodium intake from a high level to a low level but from a very high level (357 mmol) to another very high level (310 mmol) and was therefore also excluded from the analysis<sup>16</sup>. Thus 93 references<sup>17-109</sup> were integrated in the statistical analyses.

Final search: On January 21<sup>st</sup>, 2021, we performed a last additional search to record potentially eligible studies, which might have been published during the preparation of our manuscript and therefore not included in the present analysis.

We used a broad search term in PubMed (Medline and additional databases), “sodium and renin” giving 13484 results, then using publication date 1 year (overlapping our official search date, March 18 2020) as a filter to cover the period January 21<sup>st</sup> 2020 - January 21<sup>st</sup> 2021, giving 231 results. We identified four RCTs from this pool, of which two were in patients with chronic kidney disease<sup>110-111</sup> and one was in patients with diabetes<sup>112</sup>. In the last study, the strategy to reduce sodium intake did not succeed in one treatment arm and the other treatment arm included an unbalanced concomitant intervention<sup>113</sup>. As none of these 4 studies were eligible, we believe that the present analysis is up-to-date per January 21<sup>st</sup> 2021.

*Risk of bias across studies:* In populations with usual/high sodium intake there was significant inverse collinearity and in populations with low sodium intake there was a significant direct collinearity between sodium intake and duration of sodium intake (appendix figures 2-3). In populations with usual/high sodium intake there was an inverse collinearity between sodium reduction and duration of sodium intake in normotensive and hypertensive studies (appendix figure 4).

In study populations with a usual/high sodium intake the level of pl-renin and sodium intake did not differ between studies with low and high/unclear risks of bias or between studies with sodium tablet intervention and diet intervention (appendix table 3 A, lines 1-2, and 3B, lines 1-2). In study populations with a low sodium intake the level of pl-renin was lower in studies with low risk of bias and studies with sodium tablet intervention, but associated with correspondingly higher sodium intakes (Appendix Table 3 A, lines 3-4 and 3B, lines 3-4). The difference in pl-renin between usual/high sodium intake and low sodium intake was smaller in studies with low risk of bias and studies with sodium tablet intervention, but concurrently associated with a smaller change in sodium intake (Appendix Table 3 A, lines 5-6 and 3B, lines 5-6)).

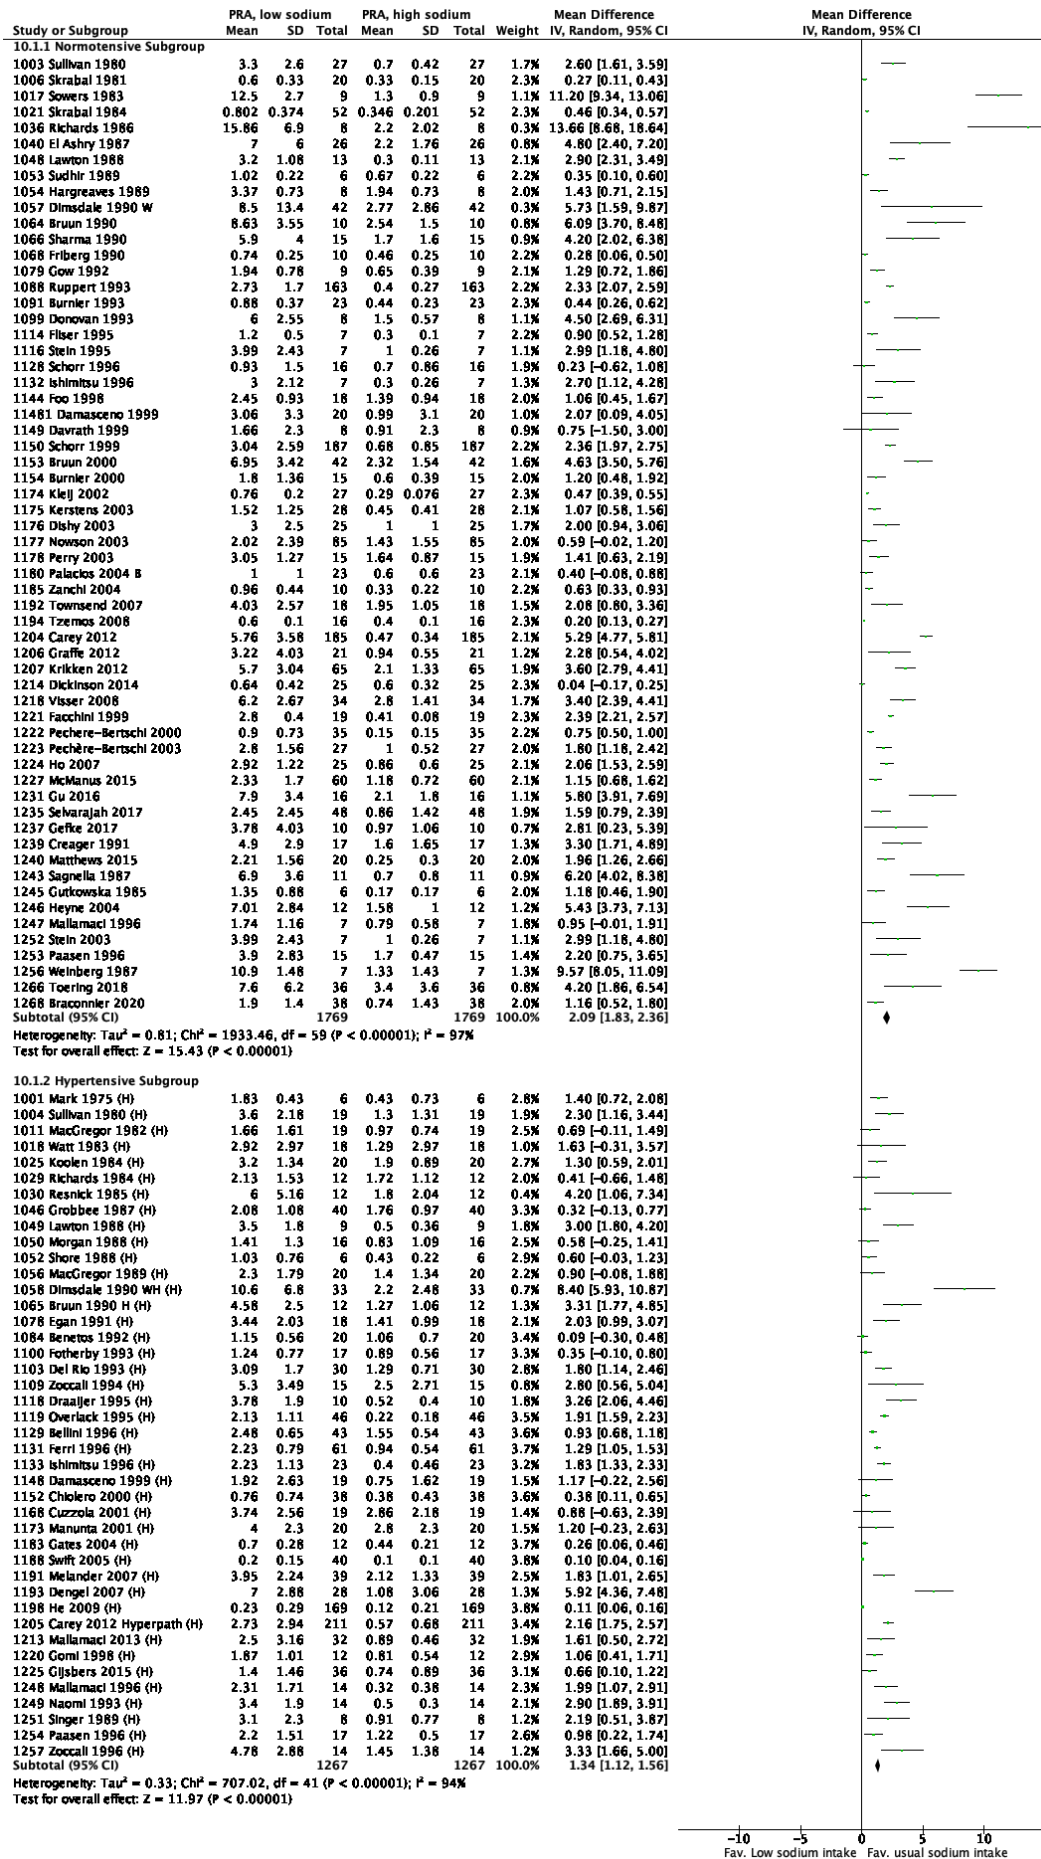

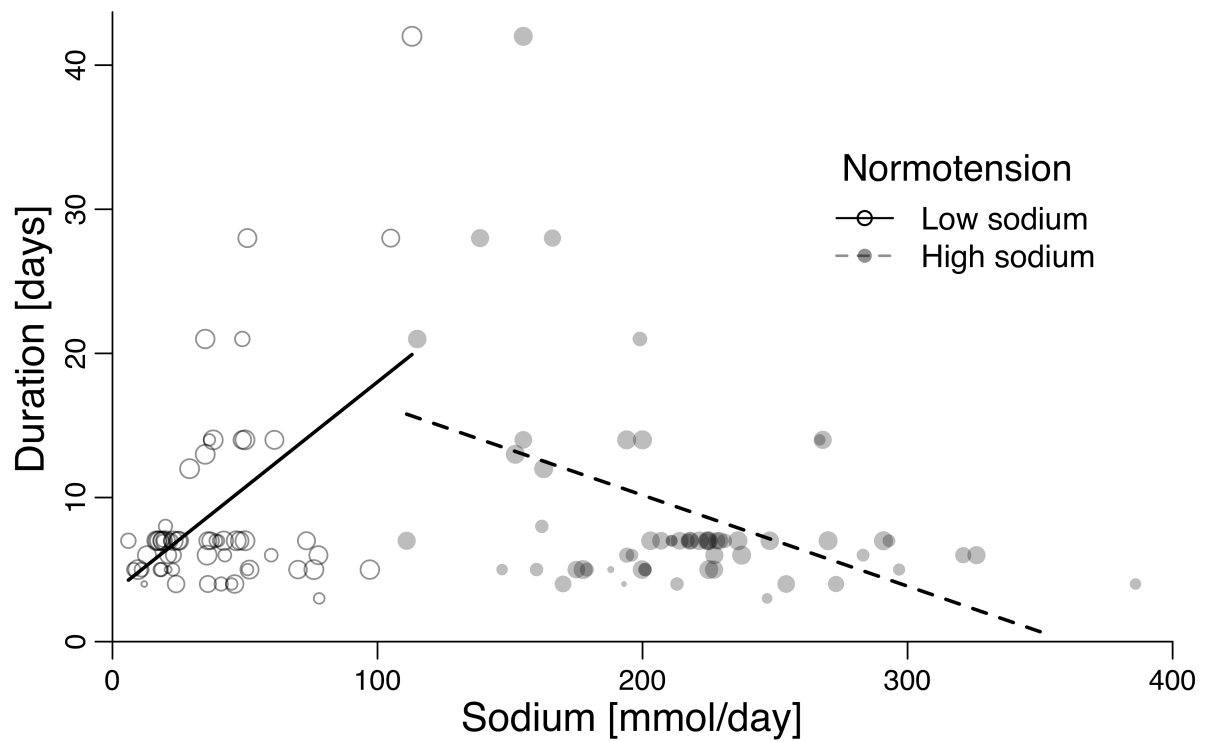

**Appendix Figure 2:** Association between sodium intake and study duration in normotensive studies at low sodium intake (solid line) and high sodium intake (dotted line)

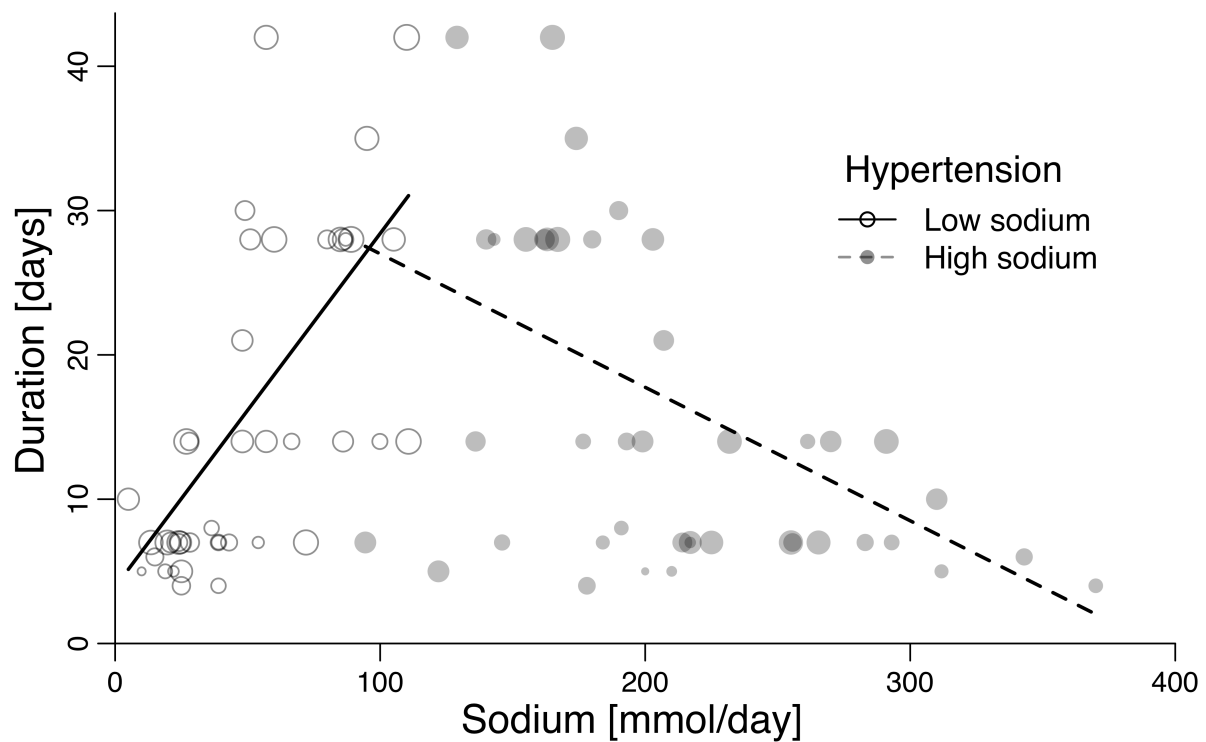

**Appendix Figure 3:** Association between sodium intake and study duration in hypertensive studies at low sodium intake (solid line) and high sodium intake (dotted line)

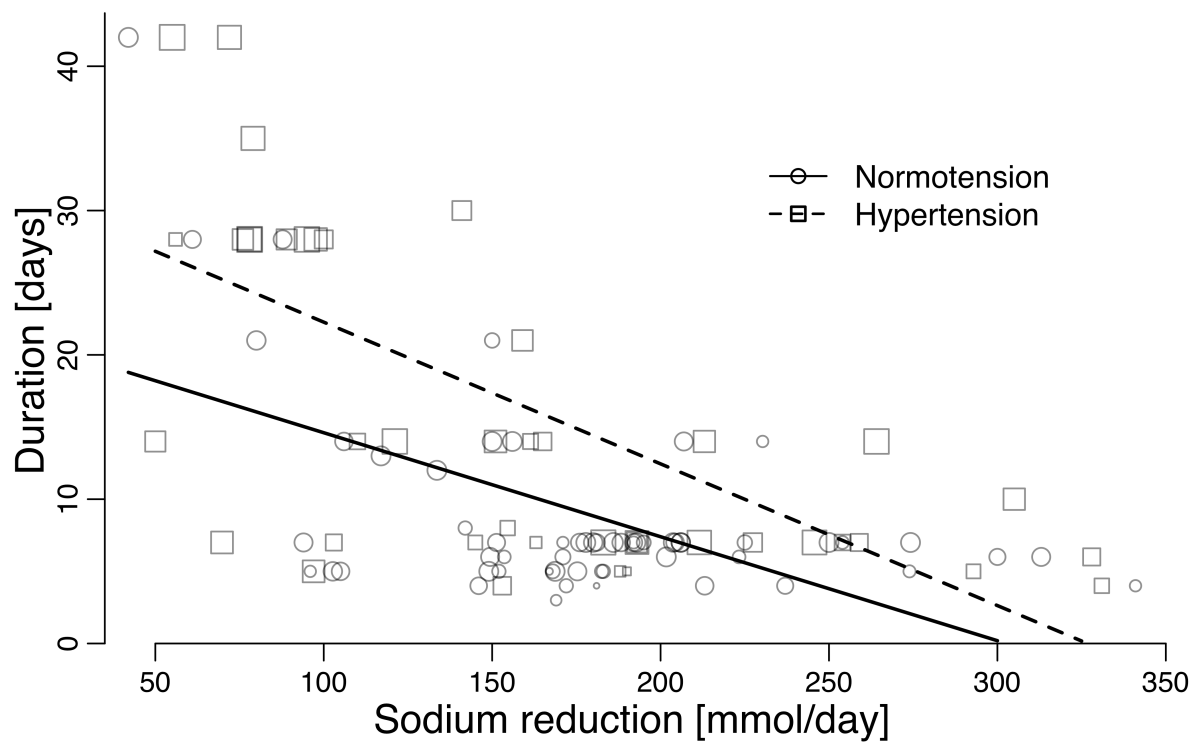

**Appendix Figure 4:** Association between change in sodium intake (sodium reduction) and study duration in normotensive studies (solid line) and hypertensive studies (dotted line)



**Appendix Table 1: Characteristics of included studies**

| Ref no | Study ID | First Author | Dur. (Days) | Restriction | BP | No  | Age  | Weight kg | S (Hi) | S (L) | SR  | SBP (Hi) | DBP (Hi) | SBP (L) | DBP (L) |
|--------|----------|--------------|-------------|-------------|----|-----|------|-----------|--------|-------|-----|----------|----------|---------|---------|
| 17     | 1001     | Mark         | 10          | diet        | H  | 6   | 28   | 80,3      | 310    | 5     | 305 | 132,8    | 79,8     | 119,7   | 72,8    |
| 18     | 1003     | Sullivan     | 4           | diet        | N  | 27  | 28,8 | 68,1      | 170    | 24    | 146 | 107,0    | 59,6     | 113,9   | 60,7    |
| 19     | 1004     | Sullivan H   | 4           | diet        | H  | 19  | 27   | 76,8      | 178    | 25    | 153 | 120,3    | 74,7     | 121,5   | 73,5    |
| 20     | 1006     | Skrabal      | 14          | diet        | N  | 20  | 23   | 75,8      | 200    | 50    | 150 | 125,0    | 73,1     | 122,3   | 70,1    |
| 20     | 1011     | Mcgregor     | 28          | SS          | H  | 19  | 49   | 80,1      | 162    | 86    | 76  | 156,0    | 98,0     | 146,0   | 93,0    |
| 21     | 1017     | Sowers       | 6           | diet        | N  | 9   | 39   |           | 196    | 42    | 154 |          |          |         |         |
| 22     | 1018     | Watt         | 28          | SS          | H  | 18  | 52   | 77,4      | 143    | 87    | 56  | 149,9    | 91,3     | 149,4   | 91,0    |
| 23     | 1021     | Skrabal      | 14          | diet        | N  | 52  | 23   | 76,5      | 194    | 38    | 156 | 121,1    | 63,6     | 118,0   | 61,8    |
| 24     | 1025     | Koolen       | 14          | SS          | H  | 20  | 40,8 | 76,9      | 270    | 57    | 213 | 147,7    | 95,4     | 141,5   | 90,5    |
| 25     | 1029     | Richards     | 28          | SS          | H  | 12  | 36   | 74,3      | 180    | 80    | 100 | 149,9    | 92,4     | 145,9   | 89,4    |
| 26     | 1030     | Resnick      | 5           | SS          | H  | 12  | 51,9 |           | 200    | 10    | 190 | 159,0    | 105,0    | 156,0   | 104,0   |
| 27     | 1036     | Richards     | 4           | diet        | N  | 8   | 36   |           | 193    | 12    | 181 | 110,0    | 56,0     | 108,0   | 63,0    |
| 28     | 1040     | El Ashry     | 14          | SS          | N  | 26  | 25,5 | 70,0      | 267    | 37    | 230 | 128,1    | 67,1     | 128,1   | 64,5    |
| 29     | 1046     | Grobee       | 42          | SS          | H  | 40  | 24   | 74,7      | 129    | 57    | 72  | 143,0    | 78,0     | 142,2   | 77,2    |
| 30     | 1048     | Lawton       | 6           | diet        | N  | 13  | 24,3 |           | 326    | 13    | 313 | 109,0    | 70,0     | 107,0   | 72,0    |
| 31     | 1049     | Lawton H     | 6           | diet        | H  | 9   | 24,8 |           | 343    | 15    | 328 | 125,0    | 82,0     | 124,0   | 86,0    |
| 32     | 1050     | Morgan       | 14          | SS          | H  | 16  | 63   | 81,0      | 136    | 86    | 50  | 173,0    | 102,0    | 170,0   | 98,0    |
| 32     | 1052     | Shore        | 5           | SS          | H  | 6   | 51,9 | 77,3      | 122    | 25    | 97  | 157,0    | 101,0    | 148,0   | 95,4    |
| 33     | 1053     | Sudhir       | 12          | SS          | N  | 6   | 34,7 |           | 163    | 29    | 134 | 128,9    | 80,7     | 121,0   | 75,7    |
| 34     | 1054     | Hargreaves   | 14          | SS          | N  | 8   | 23,4 | 71,4      | 155    | 49    | 106 | 129,0    | 66,0     | 123,0   | 63,0    |
| 35     | 1056     | McGregor     | 30          | SS          | H  | 20  | 57   | 73,6      | 190    | 49    | 141 | 163,0    | 100,0    | 147,0   | 91,0    |
| 36     | 1057     | Dimsdale     | 5           | SS          | N  | 42  | 32   |           | 188    | 21    | 167 | 122,0    | 76,0     | 123,2   | 80,2    |
| 37     | 1058     | Dimsdale H   | 5           | SS          | H  | 33  | 34   |           | 210    | 22    | 188 | 149,0    | 96,5     | 146,0   | 97,9    |
| 38     | 1064     | Eske Brun    | 4           | SS          | N  | 10  | 46   | 72,2      | 386    | 45    | 341 | 116,0    | 69,0     | 111,0   | 68,0    |
| 38     | 1065     | Eske Brun H  | 4           | SS          | H  | 12  | 47   | 77,2      | 370    | 39    | 331 | 150,0    | 96,0     | 142,0   | 92,0    |
| 39     | 1066     | Sharma       | 7           | SS          | N  | 15  | 24   | 74,4      | 211    | 19    | 192 | 106,5    | 68,3     | 105,6   | 64,6    |
| 39     | 1068     | Friberg      | 13          | SS          | N  | 10  | 33,3 | 76,3      | 152    | 35    | 117 | 114,0    | 69,0     | 114,0   | 68,0    |
| 40     | 1078     | Egan H       | 7           | SS          | H  | 18  | 35   | 79,5      | 214    | 21    | 193 | 124,4    | 77,8     | 121,7   | 76,1    |
| 41     | 1079     | Gow          | 7           | diet        | N  | 9   | 30,3 |           | 111    | 17    | 94  | 120,0    | 68,0     | 112,0   | 65,0    |
| 42     | 1084     | Benetos      | 28          | SS          | H  | 20  | 41,5 | 71,6      | 163    | 85    | 78  | 149,1    | 93,2     | 142,6   | 89,5    |
| 43     | 1088     | Ruppert      | 7           | SS          | N  | 163 | 38   | 70,7      | 291    | 17    | 274 | 113,2    | 71,5     | 111,0   | 72,5    |
| 44     | 1091     | Burnier      | 6           | diet        | N  | 23  | 29   |           | 237    | 36    | 202 | 111,7    | 72,2     | 110,7   | 73,0    |
| 45     | 1099     | Donovan      | 5           | diet        | N  | 8   | 36   | 67,0      | 160    | 8     | 152 | 116,0    | 63,0     | 114,0   | 64,0    |
| 46     | 1100     | Fotherby     | 35          | SS          | H  | 17  | 73   | 67,4      | 174    | 95    | 79  | 176,0    | 96,0     | 168,0   | 97,0    |
| 47     | 1103     | Del Rio      | 14          | SS          | H  | 30  | 49,2 | 72,4      | 199    | 48    | 151 | 156,1    | 95,5     | 154,7   | 95,0    |
| 48     | 1109     | Zoccali      | 7           | SS          | H  | 15  | 45   | 79,6      | 217    | 54    | 163 | 144,0    | 92,0     | 130,0   | 84,0    |
| 49     | 1114     | Fliser       | 7           | diet        | N  | 7   | 25,5 | 71,4      | 203    | 23    | 180 | 114,2    | 71,3     | 113,1   | 70,6    |
| 50     | 1116     | Stein        | 5           | diet        | N  | 7   | 33,7 |           | 201    | 18    | 183 | 122,9    | 70,9     | 124,3   | 69,7    |
| 51     | 1118     | Draaijer     | 7           | SS          | H  | 10  | 41   | 90,3      | 283    | 24    | 259 | 159,0    | 92,0     | 153,6   | 92,8    |
| 52     | 1119     | Overlack     | 7           | SS          | H  | 46  | 45,3 | 80,5      | 265    | 20    | 246 | 138,0    | 90,2     | 134,1   | 87,7    |
| 53     | 1128     | Schorr       | 28          | SS          | N  | 16  | 64,1 | 73,9      | 166    | 105   | 61  | 140,0    | 84,0     | 139,0   | 84,0    |
| 54     | 1129     | Bellini      | 14          | SS          | H  | 43  | 45,4 | 78,0      | 232    | 111   | 121 | 159,8    | 103,6    | 155,9   | 98,7    |
| 55     | 1131     | Ferri        | 14          | SS          | H  | 61  | 47,1 | 78,2      | 291    | 27    | 264 | 168,7    | 107,7    | 161,3   | 104,2   |
| 56     | 1132     | Ishimitsu A  | 7           | Diet        | N  | 7   | 53   | 56,8      | 217    | 22    | 195 | 116,0    | 77,0     | 114,0   | 75,0    |
| 57     | 1133     | Ishimitsu AH | 7           | Diet        | H  | 23  | 55   | 59,7      | 217    | 24    | 193 | 157,2    | 94,5     | 141,5   | 89,0    |
| 58     | 1144     | Foo          | 6           | SS          | N  | 18  | 51,1 | 71,9      | 227    | 78    | 149 | 122,8    | 76,9     | 115,1   | 79,3    |
| 58     | 1148     | Damasceno    | 7           | SS          | N  | 20  | 37,5 | 73,0      | 293    | 39    | 254 | 108,5    | 67,7     | 109,0   | 68,0    |
| 59     | 1148     | Damasceno H  | 7           | SS          | H  | 19  | 42,5 | 75,0      | 293    | 39    | 254 | 144,7    | 90,8     | 136,2   | 85,4    |
| 60     | 1149     | Davrath      | 5           | diet        | N  | 8   | 25,1 | 74,5      | 147    | 51    | 96  | 124,0    | 70,0     | 132,0   | 75,0    |
| 60     | 1150     | Schorr       | 7           | SS          | N  | 187 | 25   | 73,0      | 225    | 19    | 206 | 110,7    | 58,0     | 110,5   | 58,3    |
| 61     | 1152     | Chiolero H   | 7           | SS          | H  | 38  | 43   | 75,4      | 255    | 72    | 183 | 143,1    | 89,8     | 136,6   | 85,6    |
| 62     | 1153     | Bruun        | 4           | diet        | N  | 42  | 26   | 72,6      | 273    | 36    | 237 | 117,0    | 70,0     | 117,0   | 71,0    |
| 63     | 1154     | Burnier      | 7           | SS          | N  | 15  | 22,7 | 72,3      | 207    | 19    | 188 | 126,0    | 75,0     | 125,0   | 80,0    |
| 64     | 1168     | Cuzzola      | 14          | SS          | H  | 19  | 47   | 77,1      | 261    | 100   | 161 | 153,8    | 97,8     | 148,7   | 97,9    |
| 65     | 1173     | Manunta      | 14          | SS          | H  | 20  | 48,3 | 79,6      | 177    | 67    | 110 | 152,4    | 99,2     | 147,2   | 95,9    |
| 66     | 1174     | Kleij        | 7           | Diet        | N  | 27  | 23,7 | 74,1      | 236    | 50    | 186 | 118,5    | 74,1     | 118,7   | 74,2    |
| 67     | 1175     | Kerstens     | 7           | Diet        | N  | 28  | 23,3 | 73,6      | 248    | 42    | 206 | 114,5    | 71,5     | 117,6   | 73,5    |

|     |      |                 |    |      |   |     |      |      |     |     |     |       |       |       |       |
|-----|------|-----------------|----|------|---|-----|------|------|-----|-----|-----|-------|-------|-------|-------|
| 68  | 1176 | Dishy           | 6  | diet | N | 25  | 34   | 78,9 | 321 | 21  | 300 | 112,0 | 59,0  | 114,0 | 60,0  |
| 69  | 1177 | Nowson          | 28 | SS   | N | 92  | 45   | 69,6 | 139 | 51  | 88  | 123,0 | 75,4  | 122,3 | 75,4  |
| 70  | 1178 | Perry           | 5  | SS   | N | 15  | 26   | 74,0 | 175 | 70  | 105 | 115,0 | 60,0  | 115,0 | 58,0  |
| 71  | 1180 | Palacios B      | 21 | diet | N | 23  | 12,8 | 56,0 | 115 | 35  | 80  | 112,7 | 56,5  | 115,1 | 57,9  |
| 72  | 1183 | Gates           | 28 | SS   | H | 12  | 63,5 | 72,0 | 155 | 60  | 95  | 140,0 | 84,0  | 137,0 | 82,8  |
| 73  | 1185 | Zanchi          | 7  | diet | N | 9   | 25   | 70,6 | 270 | 20  | 250 | 117,0 | 72,0  | 114,0 | 72,0  |
| 74  | 1188 | Swift           | 28 | SS   | H | 40  | 50   | 79,0 | 167 | 89  | 78  | 156,0 | 100,0 | 148,0 | 97,0  |
| 75  | 1191 | Melander        | 28 | SS   | H | 39  | 53   | 77,4 | 140 | 51  | 89  | 144,0 | 90,6  | 138,0 | 88,3  |
| 76  | 1192 | Townsend        | 6  | SS   | N | 18  | 30   | 69,6 | 194 | 23  | 171 | 117,0 | 69,0  | 111,0 | 65,0  |
| 77  | 1193 | Dengel          | 8  | diet | H | 28  | 63   | 81,3 | 191 | 36  | 155 | 152,0 | 79,0  | 142,0 | 75,0  |
| 78  | 1194 | Tzemos          | 5  | SS   | N | 16  | 27   | 76,8 | 225 | 76  | 149 | 121,0 | 71,0  | 117,0 | 70,0  |
| 79  | 1198 | He W            | 42 | SS   | H | 169 | 50   | 85,3 | 165 | 110 | 55  | 146,0 | 90,0  | 141,2 | 87,8  |
| 80  | 1204 | Carey           | 7  | Diet | N | 185 | 47   | 70,3 | 221 | 18  | 204 | 124,0 | 74,2  | 119,9 | 73,3  |
| 80  | 1205 | Hyperpath       | 7  | Diet | H | 211 | 49,2 | 76,2 | 225 | 14  | 212 | 147,5 | 88,8  | 131,5 | 79,5  |
| 81  | 1206 | Graffe          | 4  | Diet | N | 21  | 26   | 77,8 | 213 | 41  | 172 | 124,0 | 76,0  | 126,0 | 77,0  |
| 82  | 1207 | Krikken         | 7  | Diet | N | 65  | 23   | 81,0 | 228 | 36  | 192 | 114,5 | 71,5  | 113,2 | 70,7  |
| 83  | 1213 | Mallamaci       | 14 | SS   | H | 32  | 48   | 74,0 | 193 | 28  | 165 | 143,1 | 91,0  | 135,1 | 88,0  |
| 84  | 1214 | Dickinson       | 42 | Diet | N | 25  | 35,1 | 91,0 | 155 | 113 | 42  | 123,0 | 72,0  | 121,0 | 70,0  |
| 85  | 1218 | Visser          | 7  | diet | N | 34  | 26,5 | 80,7 | 218 | 37  | 181 | 122,0 | 70,0  | 117,0 | 69,0  |
| 86  | 1220 | Gomi A          | 7  | Diet | H | 12  | 51,8 | 59,3 | 94  | 25  | 70  | 145,7 | 93,3  | 144,6 | 93,6  |
| 87  | 1221 | Facchini        | 5  | SS   | N | 19  | 43   | 79,4 | 178 | 10  | 169 | 109,2 | 68,1  | 108,9 | 67,9  |
| 88  | 1222 | Pechere-Bertchi | 7  | Diet | N | 35  | 28,9 | 60,0 | 225 | 47  | 178 | 109,2 | 75,2  | 106,8 | 74,5  |
| 89  | 1223 | Pechere-Bertchi | 7  | diet | N | 27  | 26   | 59,7 | 218 | 25  | 193 | 108,0 | 71,0  | 107,0 | 73,0  |
| 90  | 1224 | Ho              | 14 | SS   | N | 25  | 48,8 | 85,7 | 268 | 61  | 207 | 127,0 | 77,0  | 122,0 | 75,2  |
| 91  | 1225 | Gijsbers        | 28 | SS   | H | 36  | 65,8 | 82,5 | 203 | 105 | 98  | 145,3 | 80,6  | 137,8 | 77,9  |
| 92  | 1227 | McManus         | 5  | SS   | N | 60  | 50,1 | NA   | 200 | 97  | 103 | 126,7 | 76,0  |       |       |
| 93  | 1231 | Gu              | 6  | Diet | N | 16  | 28,8 | 69,3 | 283 | 60  | 223 | 117,7 | 70,8  | 118,1 | 73,9  |
| 94  | 1235 | Selvarajah      | 7  | SS   | N | 48  | 30   | 68,9 | 225 | 73  | 151 | 120,0 | 73,0  | 116,9 | 71,4  |
| 95  | 1237 | Gefke           | 3  | Diet | N | 10  | 25   | 69   | 247 | 78  | 169 | 114,0 | 68,0  | 113,0 | 68,0  |
| 96  | 1257 | Zoccali         | 7  | Diet | H | 14  | 47   | NA   | 184 | 39  | 145 | 156,0 | 101,0 | 141,0 | 94,0  |
| 97  | 1243 | Sagnella        | 5  | SS   | N | 11  | 22   | 69   | 297 | 23  | 274 | 118,4 | 73,0  | 117,8 | 74,2  |
| 98  | 1256 | Weinberg        | 7  | Diet | N | 7   |      | NA   | 231 | 6   | 225 | 116,0 | 72,0  | 116,0 | 76,0  |
| 99  | 1253 | Paasen          | 21 | Diet | N | 15  | 39   | 72,6 | 199 | 49  | 150 | 115,8 | 72,3  | 118,4 | 74,0  |
| 99  | 1254 | Paasen H        | 21 | Diet | H | 17  | 51   | 82,5 | 207 | 48  | 159 | 149,6 | 94,1  | 143,0 | 91,5  |
| 100 | 1252 | Stein           | 5  | Diet | N | 7   | 33,7 | NA   | 201 | 18  | 183 | 122,9 | 70,9  | 124,3 | 69,7  |
| 101 | 1251 | Singer          | 5  | SS   | H | 8   | 52,4 | NA   | 312 | 19  | 293 | 164,0 | 106,0 | 163,0 | 106,0 |
| 102 | 1249 | Naomi           | 7  | SS   | H | 9   | 46,9 | 60,2 | 256 | 28  | 227 | 145,1 | 86,9  | 130,3 | 80,2  |
| 103 | 1247 | Mallamci        | 7  | Diet | N | 7   | 34   | 81,3 | 214 | 48  | 176 | 121,0 |       | 118,0 |       |
| 103 | 1248 | Mallamaci H     | 7  | Diet | H | 14  | 47   | 76,4 | 146 | 43  | 103 | 138,0 |       | 127,0 |       |
| 104 | 1246 | Heyne           | 8  | Diet | N | 12  | 25,5 | NA   | 162 | 20  | 142 | 127,5 | 79,8  | 126,2 | 79,0  |
| 105 | 1245 | Gutkowska       | 4  | Diet | N | 6   | 29,3 | 68,2 | 254 | 46  | 213 |       |       |       |       |
| 106 | 1239 | Creager         | 5  | Diet | N | 17  | 30   | 74   | 179 | 11  | 168 | 122,0 | 60,0  | 124,0 | 62,0  |
| 107 | 1240 | Matthews        | 7  | Diet | N | 20  | 40,5 | 79,5 | 229 | 25  | 204 | 120,0 | 74,5  | 115,0 | 71,6  |
| 108 | 1268 | Braconnier      | 5  | SS   | N | 38  | 33,5 | 66,2 | 227 | 52  | 175 | 113,6 | 69,6  | 112,9 | 69,4  |
| 109 | 1266 | Toering         | 7  | Diet | N | 36  | 33,5 | NA   | 211 | 40  | 171 | 119,5 | 72,0  | 116,0 | 69,5  |

Dur: Study duration; SS: Slow sodium tablet; BP: Blood pressure; H: Hypertension; N: Normotension; No: Number; S: Sodium; Hi: High; L: Low; SR: Sodium reduction

**Appendix Table 2: Bias Assessment (L: Low risk of bias; H: High risk of bias, U: Unclear risk of bias)**

| Ref no | 1 <sup>st</sup> Author | Selection | Performance | Attrition | Over-all Bias * |
|--------|------------------------|-----------|-------------|-----------|-----------------|
| 17     | Mark                   | U         | H           | L         | U               |
| 18     | Sullivan               | H         | H           | L         | H               |
| 19     | Sullivan H             | H         | H           | L         | H               |
| 20     | Skrabal                | U         | H           | L         | U               |
| 20     | Mcgregor               | U         | L           | L         | L               |
| 21     | Sowers                 | U         | H           | L         | U               |
| 22     | Watt                   | U         | L           | U         | U               |
| 23     | Skrabal                | U         | H           | L         | U               |
| 24     | Koolen                 | U         | H           | L         | U               |
| 25     | Richards               | U         | H           | H         | H               |
| 26     | Resnick                | U         | H           | L         | U               |
| 27     | Richards               | U         | H           | L         | U               |
| 28     | El Ashry               | U         | H           | L         | U               |
| 29     | Grobee                 | U         | L           | L         | L               |
| 30     | Lawton                 | U         | H           | L         | U               |
| 31     | Lawton H               | U         | H           | L         | U               |
| 32     | Morgan                 | U         | H           | L         | U               |
| 32     | Shore                  | U         | H           | L         | U               |
| 33     | Sudhir                 | U         | H           | L         | U               |
| 34     | Hargreaves             | U         | L           | L         | L               |
| 35     | McGregor               | U         | L           | L         | L               |
| 36     | Dimsdale               | U         | H           | L         | U               |
| 37     | Dimsdale H             | U         | H           | L         | U               |
| 38     | Eske Brun              | U         | H           | L         | U               |
| 38     | Eske Brun H            | U         | H           | L         | U               |
| 39     | Sharma                 | U         | H           | U         | U               |
| 39     | Friberg                | U         | H           | H         | H               |
| 40     | Egan                   | L         | L           | L         | L               |
| 41     | Gow                    | U         | H           | L         | U               |
| 42     | Benetos                | U         | L           | L         | L               |
| 43     | Ruppert/Overlack       | U         | H           | L         | U               |
| 44     | Burnier                | U         | H           | L         | U               |
| 45     | Donovan                | U         | H           | L         | U               |
| 46     | Fotherby               | U         | L           | L         | L               |
| 47     | Del Rio                | U         | L           | H         | U               |
| 48     | Zoccali                | U         | H           | L         | U               |
| 49     | Fliser                 | U         | H           | L         | U               |
| 50     | Stein                  | U         | H           | L         | U               |
| 51     | Draaijer               | U         | H           | L         | U               |
| 52     | Overlack               | U         | L           | L         | L               |
| 53     | Schorr                 | U         | L           | H         | U               |
| 54     | Bellini                | U         | L           | H         | U               |
| 55     | Ferri                  | U         | L           | L         | L               |
| 56     | Ishimitsu              | U         | H           | L         | U               |
| 57     | Ishimitsu H            | U         | H           | L         | U               |
| 58     | Foo                    | U         | L           | L         | L               |
| 58     | Damasceno              | U         | L           | L         | L               |
| 59     | Damasceno H            | U         | L           | L         | L               |
| 60     | Davrath                | U         | H           | L         | U               |
| 60     | Schorr                 | U         | H           | L         | U               |
| 61     | Chiolero               | U         | H           | L         | U               |
| 62     | Bruun                  | U         | H           | L         | U               |
| 63     | Burnier                | U         | H           | L         | U               |
| 64     | Cuzzola                | U         | L           | H         | U               |
| 65     | Manunta                | U         | H           | L         | U               |
| 66     | Kleij                  | U         | H           | L         | U               |
| 67     | Kerstens               | U         | H           | L         | U               |
| 68     | Dishy                  | U         | H           | L         | U               |
| 69     | Nowson                 | U         | H           | U         | U               |
| 70     | Perry                  | U         | H           | L         | U               |
| 71     | Palacios               | U         | H           | H         | H               |
| 72     | Gates                  | U         | L           | L         | L               |
| 73     | Zanchi                 | U         | L           | L         | L               |
| 74     | Swift                  | U         | L           | U         | U               |
| 75     | Melander               | U         | L           | U         | U               |
| 76     | Townsend               | U         | H           | L         | U               |

|     |                 |   |   |   |   |
|-----|-----------------|---|---|---|---|
| 77  | Dengel          | U | L | L | L |
| 78  | Tzemos          | U | L | L | L |
| 79  | He              | L | L | L | L |
| 80  | Carey           | U | H | U | U |
| 81  | Carey H         | U | H | U | U |
| 82  | Graffe          | L | L | L | L |
| 82  | Krikken         | U | H | U | U |
| 83  | Mallamaci       | U | H | L | U |
| 84  | Dickinson       | U | U | L | U |
| 85  | Visser          | U | H | U | U |
| 86  | Gomi            | U | H | L | U |
| 87  | Facchini        | U | H | L | U |
| 88  | Pechere-Bertchi | U | H | L | U |
| 89  | Pechere-Bertchi | U | H | L | U |
| 90  | Ho              | U | H | L | U |
| 91  | Gijsbers        | L | L | L | L |
| 92  | McManus         | U | H | L | U |
| 93  | Gu              | U | H | H | H |
| 94  | Selvarajah      | U | L | U | U |
| 95  | Gefke           | U | H | U | U |
| 96  | Zoccali         | U | H | U | U |
| 97  | Sagnella        | U | H | U | U |
| 98  | Weinberg        | U | H | U | U |
| 99  | Paasen          | U | H | U | U |
| 100 | Paasen H        | U | H | U | U |
| 101 | Stein           | U | H | U | U |
| 101 | Singer          | U | H | U | U |
| 102 | Naomi           | U | H | U | U |
| 103 | Mallamaci       | L | H | U | U |
| 104 | Mallamaci H     | L | H | U | U |
| 105 | Heyne           | U | H | U | U |
| 105 | Gutkowska       | U | H | U | U |
| 106 | Creager         | U | H | U | U |
| 107 | Matthews        | U | H | U | U |
| 108 | Braconnier      | U | H | U | U |
| 109 | Toering         | U | H | U | U |

Over-all bias was defined by two or three identical assessments of L (low risk of bias), H (high risk of bias) or U (unclear risk of bias). Three different assessments (1L,1H, 1U) were assessed as U. As renin was measured blindly, detection bias was assumed to be low in all studies

**Appendix Table 3:** Impact of bias (low versus high/unclear) and type of sodium intake (diet or tablet) on plasma renin.

| A: Bias                  | Low (n = 19)  | High/Unclear (n =83)   | p      |
|--------------------------|---------------|------------------------|--------|
| 1) Renin (high sodium)   | 0.94          | 1.14                   | 0.28   |
| 2) High sodium intake    | 209           | 214                    | 0.72   |
| 3) Renin (low sodium)    | 2.17          | 3.89                   | 0.02   |
| 4) Low sodium intake     | 57            | 40                     | 0.013  |
| 5) Renin Change          | 1.23          | 2.57                   | 0.023  |
| 6) Change sodium intake  | 152           | 174                    | 0.22   |
| B: Type of sodium intake | Diet (n = 47) | Sodium Tablet (n = 55) | p      |
| 1) Renin (high sodium)   | 0.99          | 1.2                    | 0.14   |
| 2) High sodium intake    | 213           | 214                    | 0.9    |
| 3) Renin (low sodium)    | 3.87          | 3                      | 0.11   |
| 4) Low sodium intake     | 33            | 52,5                   | 0.0002 |
| 5) Renin Change          | 2.88          | 1.84                   | 0.023  |
| 6) Change sodium intake  | 180           | 162                    | 0.17   |

## References

- 1) Graudal NA, Galløe AM, Garred P. Effects of sodium restriction on blood pressure, renin, aldosterone, catecholamines, cholesterols, and triglyceride: a meta-analysis. *JAMA* 1998; 279: 1383-91.
- 2) Graudal N, Hubeck-Graudal T, Jürgens G. Effects of low sodium diet versus high sodium diet on blood pressure, renin, aldosterone, catecholamines, cholesterol, and triglyceride. *Cochrane Database of Systematic Reviews* 2011, Issue 11. Art. No.: CD004022.
- 3) Patel SM, Cobb P, Saydah S, Zhang X, de Jesus JM, Cogswell ME. Dietary sodium reduction does not affect circulating glucose concentrations in fasting children or adults: findings from a systematic review and meta-analysis. *J Nutr* 2015; 145: 505-13
- 4) Carney SL, Gillies AH, Smith AJ, Smitham S. Increased dietary sodium chloride in patients treated with antihypertensive drugs. *Clinical and Experimental Hypertension. Part A, Theory and Practice* 1991;13:401-7.
- 5) Singer DR, Markandu ND, Sugden AL, Miller MA, MacGregor GA. Sodium restriction in hypertensive patients treated with a converting enzyme inhibitor and a thiazide. *Hypertension* 1991; 17: 798-803.
- 6) Wing LMH, Arnolda LF, Harvey PJ, Upton J, Molloy D, Gabb GM, et al. Low-dose diuretic and/or dietary sodium restriction when blood pressure is resistant to ACE inhibitor. *Blood Pressure* 1998; 7: 299-307.
- 7) Pimenta E, Gaddam KK, Oparil S, Aban I, Husain S, Dell'Italia LJ, et al. Effects of dietary sodium reduction on blood pressure in subjects with resistant hypertension: results from a randomized trial. *Hypertension* 2009; 54: 475-81.
- 8) Jula AM, Karanko HM. Effects on left ventricular hypertrophy of long-term nonpharmacological treatment with sodium restriction in mild to moderate essential hypertension. *Circulation* 1994; 89: 1023-31.
- 9) Heer M, Baisch F, Kropp J, Gerzer R, Drummer C. High dietary sodium chloride consumption may not induce body fluid retention in humans. *Am J Physiol* 2000; 278: 585-95.
- 10) Cavka A, Cosic A, Jukic I, Jelakovic B, Lombard JH, Phillips SA. The role of cyclooxygenase-1 in high-salt diet-induced microvascular dysfunction in humans. *J Physiol* 2015; 593: 5313–24.
- 11) Jablonski KL, Racine ML, Geolfos CJ, Gates PE, Chonchol M, McQueen MB, et al. Dietary sodium restriction reverses vascular endothelial dysfunction in middle-aged/older adults with moderately elevated systolic blood pressure. *J Am Coll Cardiol* 2013; 61: 335-43.
- 12) De Bruin RA, Bouhuizen A, Diederich S, Perschel FH, Boomsma F, Deinum J. Validation of a new automated renin assay. *Clin Chem*. 2004; 50: 2111-6.
- 13) Huggins RL, Di Nicolantonio R, Morgan, TO. Preferred salt levels and salt taste acuity in human subjects after ingestion of untasted salt. *Appetite* 1992; 18: 111-9.
- 14) Herlitz H, Dahlöf B, Jonsson O, Friberg P. Relationship between salt and blood pressure in hypertensive patients on chronic ACE-inhibition. *Blood Pressure* 1998; 7: 47-52.
- 15) Van Twist DJ, Houben AJ, de Leeuw PW, Kroon AA. Acute eprosartan-induced intrarenal vasodilation in hypertensive humans is not influenced by dietary sodium intake or angiotensin II co-infusion. *J Hypertens* 2016; 34: 1607-14.

- 16) Paulsen L, Holst LM, Bech JN, Starklint J, Pedersen EB. Glomerular filtration rate and blood pressure are unchanged by increased sodium intake in atorvastatin-treated healthy men. *Scand J Clin Lab Invest* 2009; 69: 323-9.
- 17) Mark AL, Lawton WJ, Abboud FM, Fitz AE, Connor WE, Heistad DD. Effects of high and low sodium intake on arterial pressure and forearm vascular resistance in borderline hypertension. *Circulation Research* 1975; 36(6 Suppl 1): 194-8.
- 18) Sullivan JM, Ratts TE, Taylor JC, Kraus DH, Barton BR, Patrick DR, et al. Hemodynamic effects of dietary sodium in man. *Hypertension* 1980; 2: 506-14.
- 19) Skrabal F, Auböck J, Hörtnagel H. Low sodium/high potassium diet for prevention of hypertension: probable mechanisms of action. *Lancet* 1981; 2(8252): 895-900.
- 20) MacGregor GA, Markandu ND, Best FE, Elder DM, Cam JM, Sagnella GA, et al. Double-blind randomised crossover trial of moderate sodium restriction in essential hypertension. *Lancet* 1982; 1(8268): 351-5
- 21) Sowers JR, Martin VI, Beck FW. Effects of dietary sodium on circadian rhythm and physiological responses of 18-hydroxycorticosterone. *Clin Sci* 1983; 64: 295-301.
- 22) Watt GCM, Edwards C, Hart JT, Hart M, Walton P, Foy CJW. Dietary sodium restriction for mild hypertension in general practice. *BMJ* 1983; 286(6363): 432-6.
- 23) Skrabal F, Herholz H, Neumayr M, Hamberger L, Ledochowski M, Sporer H, et al. Salt sensitivity in humans is linked to enhanced sympathetic responsiveness and to enhanced proximal tubular reabsorption. *Hypertension* 1984; 6: 152-8.
- 24) Koolen MI, Brummelen P. Sodium sensitivity in essential hypertension: Role of the renin-angiotensin-aldosterone system and the predictive value of an intravenous frusemide test. *J Hypertens* 1984; 2: 55-9.
- 25) Richards AM, Nicholls MG, Espiner EA, Ikram H, Maslowski AH, Hamilton EJ, Wells JE. Blood pressure response to moderate sodium restriction and to potassium supplementation in mild essential hypertension. *Lancet* 1984; 1(8380): 757-61.
- 26) Resnick LM, Nicholson JP, Laragh JH. Alterations in calcium metabolism mediate dietary salt sensitivity in essential hypertension. *Trans Assoc Am Phys* 1985; 98: 313-21.
- 27) Richards AM, Tonolo G, Cleland JG, Leckie BJ, McIntyre GD, Ingram M, et al. Plasma atrial natriuretic peptide: responses to modest and severe sodium restriction. *J Hypertens Suppl* 1986; 4: S559-63.
- 28) El Ashry A, Heagerty AM, Alton SM, Bing RF, Swales JD, Thurston H. Effects of manipulation of sodium balance on erythrocyte sodium transport. *J Hum Hypertens* 1987; 1: 105-11.
- 29) Grobbee DE, Hofman A, Roelandt JT, Boomsma F, Schalekamp MA, Valkenburg HA. Sodium restriction and potassium supplementation in young people with mildly elevated blood pressure. *J Hypertens* 1987; 5: 115-9.
- 30) Lawton WJ, Sinkey CA, Fitz AE, Mark AL. Dietary salt produces abnormal renal vasoconstrictor responses to upright posture in borderline hypertensive subjects. *Hypertension* 1988; 11: 529-36.
- 31) Morgan T, Anderson A. Interaction in hypertensive men between sodium intake, converting enzyme inhibitor (enalapril), plasma renin and blood pressure control. *Journal of Human Hypertension* 1988; 1: 311-5.
- 32) Shore AC, Markandu ND, McGregor GA. A randomised cross-over study to compare the blood pressure response to sodium loading with and without chloride in patients with essential hypertension. *J Hypertens* 1988; 6: 613-7.
- 33) Sudhir K, Friberg P, Meredith IT, Woods RL, Esler MD, Jennings GL. Cardiac secretion and renal clearance of atrial natriuretic peptide in normal man: effect of salt restriction. *Clin Sci* 1989; 77: 605-10.

- 34) Hargreaves M, Morgan TO, Snow R, Guerin M. Exercise tolerance in the heat on low and normal salt intake. *Clin Sci* 1989; 76: 553-7.
- 35) McGregor GA, Markandu ND, Sagnella GA, Singer DRJ, Cappuccio FP. Double-blind study of three sodium intakes and long-term effects of sodium restriction in essential hypertension. *Lancet* 1989; 2(8674): 1244-7.
- 36) Dimsdale JE, Ziegler M, Mills P, Berry C. Prediction of salt sensitivity. *Am J Hypertens* 1990; 3: 429-35.
- 37) Bruun NE, Skøtt P, Nielsen MD, Rasmussen S, Schütten HJ, Leth A, et al. Normal renal tubular response to changes of sodium intake in hypertensive man. *J Hypertens* 1990; 8: 219-27.
- 38) Sharma AM, Kribben A, Schattenfroh S, Cetto C, Distler A. Salt sensitivity in humans is associated with abnormal acid-base regulation. *Hypertension* 1990; 16: 407-13.
- 39) Friberg P, Meredith I, Jennings G, Lambert G, Fazio V, Esler M. Evidence for increased renal norepinephrine overflow during sodium restriction in humans. *Hypertension* 1990; 16: 121-30.
- 40) Egan BM, Weder AB, Petrin J, Hoffman RG. Neurohumoral and metabolic effects of short-term dietary NaCl restriction in men: relationship to salt-sensitivity status. *Am J Hypertens* 1991; 4: 416-21.
- 41) Gow IF, Dockrell M, Edwards CRW, Elder A, Grieve J, Kane G, et al. The sensitivity of human blood platelets to the aggregation agent ADP during different dietary sodium intakes in healthy men. *Eur J Clin Pharm* 1992; 43: 635-8.
- 42) Benetos A, Xiao YY, Cucho JL, Hannaert P, Safar M. Arterial effects of salt restriction in hypertensive patients. A 9-week, randomized, double-blind, crossover study. *J Hypertens* 1992; 10: 355-60.
- 43) Ruppert M, Overlack A, Kolloch R, Kraft K, Göbel B, Stumpe KO. Neurohormonal and metabolic effects of severe and moderate salt restriction in non-obese normotensive adults. *Hypertension* 1993; 11: 743-9.
- 44) Burnier M, Rutschmann B, Nussberger J, Versaggi J, Shahinfar S, Waeber B, et al. Salt dependent renal effects of an angiotensin II antagonist in healthy subjects. *Hypertension* 1993; 22: 339-47.
- 45) Donovan DS, Solomon CG, Seely EW, Williams GH, Simonson DC. Effect of sodium intake on insulin sensitivity. *Am J Physiol* 1993; 264: E730-4
- 46) Fotherby MD, Potter JF. Effects of moderate sodium restriction on clinic and twenty-four-hour ambulatory blood pressure in elderly hypertensive subjects. *J Hypertens* 1993; 11: 657-63.
- 47) Del Rio A, Rodriguez Villamil JL. Metabolic effects of strict salt restriction in essential hypertensive patients. *JIM* 1993; 233: 409-14.
- 48) Zoccali C, Mallamaci F, Parlongo S. The influence of salt intake on plasma calcitonin gene-related peptide in subjects with mild essential hypertension. *J Hypertens* 1994; 12: 1249-53
- 49) Fliser D, Fode P, Arnold U, Nowicki M, Kohl B, Ritz E. The effect of dietary salt on insulin sensitivity. *Eur J Clin Invest* 1995; 25: 39-43
- 50) Stein CM, Nelson R, Brown M, He H, Wood M, Wood AJ. Dietary sodium intake modulates systemic but not forearm norepinephrine release. *Clin Pharm Ther* 1995; 58: 425-33.
- 51) Draaijer P, De Leeuw P, Maessen J, Van Hooff J, Leunissen K. Salt-sensitivity testing in patients with borderline hypertension: Reproducibility and potential mechanisms. *J Hum Hypertens* 1995; 9: 263-9.
- 52) Overlack A, Ruppert M, Kolloch R, Kraft K, Stumpe KO. Age is a major determinant of the divergent blood pressure responses to varying salt intake in essential hypertension. *Am J Hypertens* 1995; 8: 829-36.

- 53) Schorr U, Distler A, Sharma AM. Effect of sodium chloride- and sodium bicarbonate-rich mineral water on blood pressure and metabolic parameters in elderly normotensive individuals: a randomized double-blind crossover trial. *J Hypertens* 1996; 14: 131-5.
- 54) Bellini C, Ferri C, Carlomagno A, Necozone S, Lepore A, Desideri G, et al. Impaired inactive to active kallikrein conversion in human salt-sensitive hypertension. *JASN* 1996; 7: 2565-77
- 55) Ferri C, Bellini C, Carlomagno A, Desideri G, Santucci A. Active kallikrein response to changes in sodium-chloride intake in essential hypertensive patients. *JASN* 1996; 7: 443-53.
- 56) Ishimitsu T, Nishikimi T, Matsuoka H, Kangawa K, Kitamura K, Minami J, et al. Behaviour of adrenomedullin during acute and chronic salt loading in normotensive and hypertensive subjects. *Clin Sci* 1996; 91: 293-8.
- 57) Foo M, Denver AE, Coppack SW, Yudkin JS. Effect of salt-loading on blood pressure, insulin sensitivity and limb blood flow in normal subjects. *Clin Sci (London)* 1998; 95: 157-64
- 58) Damasceno A, Santos A, Serrao P, Caupers P, Soares-da-Silva P, Polonia J. Deficiency of renal dopaminergic-dependent natriuretic response to acute sodium load in black salt-sensitive subjects in contrast to salt-resistant subjects. *J Hypertens* 1999; 17: 1995-2001.
- 59) Davrath LR, Gotshall RW, Tucker A, Sadeh WZ, Luckasen GJ, Downes TR, et al. Moderate sodium restriction does not alter lower body negative pressure tolerance. *Aviat, Space, Envir MD* 1999; 70: 577-82.
- 60) Schorr U, Blaschke K, Beige J, Distler A, Sharma AM. Angiotensinogen M235T variant and salt sensitivity in young normotensive Caucasians. *J Hypertens* 1999; 17: 475-9.
- 61) Chioloro, A, Maillard, M, Nussberger, J, Brunner HR. Proximal sodium reabsorption: An independent determinant of blood pressure response to salt. *J Hypertens* 2000; 36: 631-7.
- 62) Bruun NE, Dige-Pedersen H, Skott P. Normal responses of atrial natriuretic factor and renal tubular function to sodium loading in hypertension-prone humans. *Blood Pressure* 2000; 9: 206-13.
- 63) Burnier M, Monod M, Chioloro A, Maillard M, Nussberger J, Brunner HR. Renal sodium handling in acute and chronic salt loading/depletion protocols: the confounding influence of acute water loading. *J Hypertens* 2000; 18: 1657-64.
- 64) Cuzzola F, Mallamaci F, Tripepi G, Parlongo S, Cutrupi S, Cataliotti A, et al. Urinary adrenomedullin is related to ET-1 and salt intake in patients with mild essential hypertension. *Am J Hypertens* 2001; 14: 224-30
- 65) Manunta P, Messaggio E, Ballabeni C, Sciarrone MT, Lanzani C, Ferrandi M, et al. Plasma ouabain-like factor during acute and chronic changes in sodium balance in essential hypertension. *Hypertension* 2001; 38: 198-203
- 66) van der Kleij FGH, de Jong PE, Henning RH, de Zeeuw D, Navis G. Enhanced responses of blood pressure, renal function, and aldosterone to angiotensin I in the DD genotype are blunted by low sodium intake. *JASN* 2002; 13: 1025-33.
- 67) Kerstens MN, van der Kleij FG, Boonstra AH, Sluiter WJ, Koerts J, Navis G, et al. Salt loading affects cortisol metabolism in normotensive subjects: relationships with salt sensitivity. *JCEM* 2003; 88: 4180-5.
- 68) Dishy V, Sofowora GG, Imamura H, Nishimi Y, Xie HG, Wood AJ, et al. Nitric oxide production decreases after salt loading but is not related to blood pressure changes or nitric oxide-mediated vascular responses. *J Hypertens* 2003; 21: 153-7.
- 69) Nowson CA, Morgan TO, Gibbons C. Decreasing dietary sodium while following a self-selected potassium-rich diet reduces blood pressure. *J Nutr* 2003; 133: 4118-23.



- 70) Perry CG, Palmer T, Cleland SJ, Morton IJ, Salt IP, Petrie JR, et al. Decreased insulin sensitivity during dietary sodium restriction is not mediated by effects of angiotensin II on insulin action. *Clin Sci* 2003; 105: 187-94.
- 71) Palacios C, Wigertz K, Martin BR, Jackman L, Pratt JH, Peacock M, et al. Sodium retention in black and white female adolescents in response to salt intake. *JCEM* 2004; 89: 1858-63.
- 72) Gates PE, Tanaka H, Hiatt WR, Seals DR. Dietary sodium restriction rapidly improves large elastic artery compliance in older adults with systolic hypertension. *Hypertension* 2004; 44: 35-41.
- 73) Zanchi A, Chiolero A, Maillard M, Nussberger J, Brunner HR, Burnier M. Effects of the peroxisomal proliferator-activated receptor-gamma agonist pioglitazone on renal and hormonal responses to salt in healthy men. *JCEM* 2004; 89: 1140-5.
- 74) Swift P, Markandu N, Sagnella G, He F, MacGregor GA. Modest salt reduction reduces blood pressure and urine protein excretion in black hypertensives: a randomized control trial. *Hypertension* 2005; 46: 308-12
- 75) Melander O, von Wörm F, Frandsen E, Burri P, Willsten G, Aurell M, et al. Moderate salt restriction effectively lowers blood pressure and degree of salt sensitivity is related to baseline concentration of renin and N-terminal atrial natriuretic peptide in plasma. *J Hypertens* 2007; 25: 619-27.
- 76) Townsend RR, Kapoor S, McFadden CB. Salt intake and insulin sensitivity in healthy human volunteers. *Clin Sci (London)* 2007; 113: 141-8.
- 77) Dengel DR, Brown MD, Ferrell RE, Reynolds TH, Supiano MA. A preliminary study on T-786C endothelial nitric oxide synthase gene and renal hemodynamic and blood pressure responses to dietary sodium. *Physiol Res* 2007; 56: 393-401
- 78) Tzemos N, Lim PO, Wong S, Struthers AD, MacDonald TM. Adverse cardiovascular effects of acute salt loading in young normotensive individuals. *Hypertension* 2008; 51:1525-35.
- 79) He FJ, Marciniak M, Visagie E, Markandu ND, Anand V, Dalton RN, et al. Effect of modest salt reduction on blood pressure, urinary albumin, and pulse wave velocity in white, black, and Asian mild hypertensives. *Hypertension* 2009; 54: 482-8
- 80) Carey RM, Schoeffel CD, Gildea JJ, Jones JE, McGrath HE, Gordon LN, et al. Salt sensitivity of blood pressure is associated with polymorphisms in the sodium-bicarbonate cotransporter. *Hypertension* 2012; 60: 1359-66.
- 81) Graffe CC, Bech JN, Pedersen EB. Effect of high and low sodium intake on urinary aquaporin-2 excretion in healthy humans. *Am J Physiol. Ren Physiol.* 2012; 15: F264-75.
- 82) Krikken JA, Dallinga-Thie GM, Navis G, Dullaart RP. Short term dietary sodium restriction decreases HDL cholesterol, apolipoproteinA-I and high molecular weight adiponectin in healthy young men: relationships with renal hemodynamics and RAAS activation. *NMCD* 2012; 22: 35-41.
- 83) Mallamaci F, Leonardis D, Pizzini P, Cutrupi S, Tripepi G, Zoccali C. Procalcitonin and the inflammatory response to salt in essential hypertension: a randomized cross-over clinical trial. *J Hypertens* 2013; 31: 1424-30.
- 84) Dickinson KM, Clifton PM, Keogh JB. A reduction of 3 g/day from a usual 9g/day salt diet improves endothelial function and decreases endothelin-1 in a randomised cross over study in normotensive overweight and obese subjects. *Atherosclerosis* 2014; 233: 32-8.
- 85) Visser FW, Boonstra AH, Titia Lely A, Boomsma F, Navis G. Renal response to angiotensin II is blunted in sodium-sensitive normotensive men. *Am J Hypertens* 2008; 21: 323-8.
- 86) Gomi T, Shibuya Y, Sakurai J, Hirawa N, Hasegawa K, Ikeda T. Strict dietary sodium reduction worsens insulin sensitivity by increasing sympathetic nervous activity in patients with primary hypertension. *Am J Hypertens* 1998; 11: 1048-55.

- 87) Facchini FS, Do Nascimento C, Reaven GM, Yip JW, Ni XP, Humphreys MH. Blood pressure, sodium intake, insulin resistance, and urinary nitrate excretion. *Hypertension* 1999; 33: 1008-12
- 88) Pechère-Bertschi A, Maillard M, Stalder H, Brunner HR, Burnier M. Blood pressure and renal haemodynamic response to salt during the normal menstrual cycle. *Clin Sci (London)* 2000; 98: 697-702.
- 89) Pechère-Bertschi A, Maillard M, Stalder H, Bischof P, Fathi M, Brunner HR, et al. Renal hemodynamic and tubular responses to salt in women using oral contraceptives. *KI* 2003; 64: 1374-80.
- 90) Ho JT, Keogh JB, Bornstein SR, Ehrhart-Bornstein M, Lewis JG, Clifton PM, et al. Moderate weight loss reduces renin and aldosterone but does not influence basal or stimulated pituitary-adrenal axis function. *Hormone and Metabolic Research* 2007; 39: 694-9.
- 91) Gijsbers L, Dower JI, Schalkwijk CG, Kusters YH, Bakker SJ, Hollman PC, et al. Effects of sodium and potassium supplementation on endothelial function: a fully controlled dietary intervention study. *BJN* 2015; 114: 1419-26
- 92) McManus F, Fraser R, Davies E, Connell JMC, Freel EM. Plasma steroid profiling and response to trophins to illustrate intra-adrenal dynamics. *Clin Endocrinol (Oxford)* 2015; 82: 149-57
- 93) Gu N, Cho JY, Shin KH, Jang IJ, Rhee MY. The influence of dietary sodium content on the pharmacokinetics and pharmacodynamics of fimasartan. *Drug Des Devel Ther* 2016; 10: 1525-31.
- 94) Selvarajah V, Mäki-Petäjä KM, Pedro L, Bruggraber SFA, Burling K, Goodhart AK, Brown MJ, McEniery CM, Wilkinson IB. Novel Mechanism for Buffering Dietary Salt in Humans: Effects of Salt Loading on Skin Sodium, Vascular Endothelial Growth Factor C, and Blood Pressure. *Hypertension* 2017; 70: 930-937.
- 95) Gefke M, Christensen NJ, Bech P, Frandsen E, Damgaard M, Asmar A, et al. Hemodynamic responses to mental stress during salt loading. *Clin Physiol Funct Imaging* 2017; 37: 688-694.
- 96) Zoccali C, Mallamaci F, Cuzzola F, Leonardis D. Reproducibility of the response to short-term low salt intake in essential hypertension. *J Hypertens* 1996; 14: 1455-9.
- 97) Sagnella GA, Markandu ND, Shore AC, Forsling ML, MacGregor GA. Plasma atrial natriuretic peptide: its relationship to changes in sodium intake, plasma renin activity and aldosterone in man. *Clin Sci (London)* 1987; 72: 25-30.
- 98) Weinberg M, Belknap S, Trebbin W, Solomon RJ. Effects of changing salt and water balance on renal kallikrein, kininogen and kinin. *KI* 1987; 31: 836-41.
- 99) Van Paassen P, de Zeeuw D, Navis G, de Jong PE. Does the renin-angiotensin system determine the renal and systemic hemodynamic response to sodium in patients with essential hypertension? *Hypertension* 1996; 27: 202-8.
- 100) Stein CM, Nelson R, Brown M, Wood M, Wood AJ. Dietary sodium intake modulates vasodilation mediated by nitroprusside but not by methacholine in the human forearm. *Hypertension* 1995; 25: 1220-3.
- 101) Singer DR, Markandu ND, Buckley MG, Miller MA, Sugden AL, Sagnella GA, et al. Prolonged decrease in blood pressure after atrial natriuretic peptide infusion in essential hypertension: a new anti-pressor mechanism? *Clin Sci (Lond)*. 1989; 77: 253-8.
- 102) Naomi S, Umeda T, Iwaoka T, Yamauchi J, Ideguchi Y, Fujimoto Y, et al. Endogenous erythropoietin and salt sensitivity of blood pressure in patients with essential hypertension. *Am J Hypertens* 1993; 6: 15-20.
- 103) Mallamaci F, Leonardis D, Bellizzi V, Zoccali C. Does high salt intake cause hyperfiltration in patients with essential hypertension? *J Hum Hypertens* 1996; 10: 157-61.

- 104) Heyne N, Benöhr P, Mühlbauer B, Delabar U, Risler T, Osswald H. Regulation of renal adenosine excretion in humans--role of sodium and fluid homeostasis. *NDT* 2004; 19: 2737-41.
- 105) Gutkowska J, Schiffrin EL, Cantin M, Genest J. Effect of dietary sodium on plasma concentration of immunoreactive atrial natriuretic factor in normal humans. *Clin Invest Med*. 1986; 9: 222-4.
- 106) Creager MA, Roddy MA, Holland KM, Hirsch AT, Dzau VJ. Sodium depresses arterial baroreceptor reflex function in normotensive humans. *Hypertension* 1991; 17: 989-96.
- 107) Matthews EL, Brian MS, Ramick MG, Lennon-Edwards S, Edwards DG, Farquhar WB. High dietary sodium reduces brachial artery flow-mediated dilation in humans with salt-sensitive and salt-resistant blood pressure. *J Appl Physiol* 2015; 118: 1510-5.
- 108) Braconnier P, Milani B, Loncle N, Lourenco JM, Brito W, Delacoste J, et al. Short-term changes in dietary sodium intake influence sweat sodium concentration and muscle sodium content in healthy individuals. *J Hypertens* 2020; 38: 159-166.
- 109) Toering TJ, Gant CM, Visser FW, van der Graaf AM, Laverman GD, Danser AHJ, et al. Sex differences in renin-angiotensin-aldosterone system affect extracellular volume in healthy subjects. *Am J Physiol Renal Physiol* 2018; 314: F873-F878.
- 110) Bovée DM, Visser WJ, Middel I, De Mik-van Egmond A, Greupink R, Masereeuw R, et al. A Randomized Trial of Distal Diuretics versus Dietary Sodium Restriction for Hypertension in Chronic Kidney Disease. *JASN* 2020; 31:650-662.
- 111) Bovée DM, Roksnoer LCW, van Kooten C, Rotmans JI, Vogt L, de Borst MH, et al. Effect of sodium bicarbonate supplementation on the renin-angiotensin system in patients with chronic kidney disease and acidosis: a randomized clinical trial. *J Nephrol* 2020 Dec 31. doi:10.1007/s40620-020-00944-5. Epub ahead of print.
- 112) Baqar S, Kong YW, Chen AX, O'Callaghan C, MacIsaac RJ, Bouterakos M, et al. Effect of Salt Supplementation on Sympathetic Activity and Endothelial Function in Salt-Sensitive Type 2 Diabetes. *JCEM* 2020; 105: dgz219.
- 113) Toft U, Riis NL, Lassen AD, Trolle E, Andreasen AH, Frederiksen AKS, et al. The Effects of Two Intervention Strategies to Reduce the Intake of Salt and the Sodium-To-Potassium Ratio on Cardiovascular Risk Factors. A 4-Month Randomised Controlled Study among Healthy Families. *Nutrients* 2020; 12: 1467.
